# Supplementary material
Source: Springer Nature journal article supplement (https://www.springermedizin.de/resource/supplementary/12906_2012_1205_MOESM8_ESM.pdf/9520126)
Supplement: MOESM8 [file 9520126]

Table 8 Open issue for prescribing Kampo medicine (n=285)

| Concerns                                                                  | frequency | %    |
|---------------------------------------------------------------------------|-----------|------|
| The dose and dosage form need to be well-arranged for simpler application | 173       | 60.7 |
| Evidences have not yet provided from the placebo-controlled study         | 109       | 38.2 |
| Action mechanism of Kampo medicine has not yet elucidated                 | 97        | 34.0 |
| No opportunity to learn about Kampo medicines                             | 90        | 31.6 |
| Relatively weak effect                                                    | 79        | 27.7 |
| Drug interaction is uncertain                                             | 66        | 23.2 |
| Production of effect is slow                                              | 56        | 19.6 |
| Others                                                                    | 25        | 8.8  |
| There is no issue                                                         | 12        | 4.2  |

\*Multiple answers allowed
